# Supplementary material
Source: Royal Society of Chemistry journal article supplement (doi:10.1039/d6gc01017b)
Supplement: d6gc01017b2.pdf [file d6gc01017b2.pdf]

*Supporting Information for*

**Mild-depolymerized lignin for reinforced polyvinyl alcohol wood adhesives**

Rong Tan,<sup>a</sup> Shuang-Lin Zou,<sup>a</sup> Ying-Chun Xu,<sup>a</sup> Jia-Hui Wang,<sup>a</sup> Peng Zhu,<sup>a</sup> Qiang Wang,<sup>a</sup> Gui-Xia Zhang,<sup>b</sup> Chang-You Shao,<sup>a</sup> Ji Zhao,<sup>c</sup> Lu Zheng,<sup>c</sup> Ling-Ping Xiao,<sup>\*a,d</sup> and Run-Cang Sun<sup>a</sup>

<sup>a</sup> *Liaoning Key Lab of Lignocellulose Chemistry and BioMaterials, Liaoning Collaborative Innovation Center for Lignocellulosic Biorefinery, College of Light Industry and Chemical Engineering, Dalian Polytechnic University, Dalian 116034, China*

<sup>b</sup> *School of Textile and Material Engineering, Dalian Polytechnic University, Dalian 116034, China*

<sup>c</sup> *Shanghai Changfa New Materials Co., Ltd., Shanghai 200030, China*

<sup>d</sup> *Instrumental Analysis Center, Dalian Polytechnic University, Dalian 116034, China*

\* Corresponding author.

E-mail address: lpxiao@dlpu.edu.cn (L.-P. Xiao).

## Table of contents

|                                                                      |    |
|----------------------------------------------------------------------|----|
| 1. Materials and chemicals .....                                     | 3  |
| 2. Lignin depolymerization .....                                     | 3  |
| 3. Characterizations .....                                           | 3  |
| 4. Oxidation mechanism of polyvinyl alcohol .....                    | 7  |
| 5. GC-MS details of lignin oil .....                                 | 8  |
| 6. 2D-HSQC NMR details of lignin and lignin oil .....                | 9  |
| 7. TG and DTG details of adhesive samples and lignin .....           | 10 |
| 8. DSC details of adhesive samples and lignin .....                  | 11 |
| 9. FTIR details of adhesive samples and lignin .....                 | 12 |
| 10. Rheological characterization of adhesive samples .....           | 13 |
| 11. Bonding properties of adhesives .....                            | 14 |
| 12. Direct preparation of adhesives from lignin .....                | 15 |
| 13. Curing conditions of plywood samples .....                       | 16 |
| 14. Practical application scenarios for adhesives .....              | 17 |
| 15. VOCs details of adhesives .....                                  | 19 |
| 16. Screening of hot-pressing conditions for plywood .....           | 20 |
| 17. <sup>31</sup> P NMR details of adhesive samples and lignin ..... | 21 |
| 18. Properties comparison .....                                      | 22 |
| 19. Cost accounting for adhesives .....                              | 24 |
| 20. Formaldehyde emission .....                                      | 25 |
| 21. Solid content .....                                              | 26 |
| 22. Limits of harmful substances in adhesives .....                  | 27 |
| 23. Key operating parameters of the UV aging chamber .....           | 28 |
| 24. References .....                                                 | 29 |

## 1. Materials and chemicals

Lignin, separated from the Eucalyptus pre-hydrolysis liquor, was kindly provided by Jining Mingsheng New Material Co., Ltd., China. The above industrial lignin was used directly without any pretreatment such as drying and impurity removal to conform to the industrial application requirements of low energy consumption and simple process. PVA (hydrolysis degree: 87% – 89%) was purchased from Aladdin Co., Ltd (Shanghai, China). Sodium hydroxide (NaOH), potassium persulfate ( $K_2S_2O_8$ ), glutaraldehyde (GA, 50 wt% aqueous solution), Methanol ( $CH_3OH$ ) were purchased from Energy-Chemical Co., Ltd (Anhui, China).

## 2. Lignin depolymerization

The Depolymerization reaction of lignin was performed in a Parr reactor (100 mL). Typically, lignin (3 – 4.5% of the total solid mass in the reaction system), sodium hydroxide (0.9 g), and a methanol-water mixture with a volume ratio of 1:4 was added to the reactor. Under the stirring of a glass rotor at 800 rpm, the reactor was evacuated and flushed with  $N_2$  three times to expel air. Next, the reactor was heated up to the target temperature (120 – 180 °C) and held at atmospheric pressure for 1 h without additional gas introduction. After the reaction, the Parr reactor was cooled and depressurized carefully.

## 3. Characterizations

Fourier transform infrared spectroscopy (FT-IR). FT-IR spectra of lignin were recorded using a Perkin-Elmer spectrophotometer. The spectra of powdered lignin supported by KBr pellets were recorded in the range of 400 to 4000  $cm^{-1}$  with 32 scans averaged at 4.0  $cm^{-1}$  resolution at room temperature.

Nuclear magnetic resonance (NMR). All NMR spectra were recorded on a Bruker Ascend-400 MHz spectrometer instrument (Bruker, Germany). Specifically, the structural characteristics of lignin samples were analyzed using 2D HSQC NMR and the amount and distribution of hydroxyl groups in lignin were determined by quantitative  $^{31}P$  NMR. The spectra obtained from all tests were analyzed by TopSpin 4.0 software.

Gel permeation chromatography (GPC) analysis. To investigate the molecular weight ( $M_w$  and  $M_n$ ) and polydispersity index ( $\mathcal{D}$ ) of the lignin samples after acetylation, gel permeation chromatography analysis was performed as previously described.<sup>1</sup>

Thermal Analysis. The thermal degradability of the samples was tested using TA Q500 thermal analyzer (TA, Inc., USA). Under a nitrogen atmosphere, the sample was heated from 30 °C to 800 °C at a rate of 10 °C min<sup>-1</sup>. Differential Scanning Calorimetry (DSC). DSC on a DSC6000 apparatus (TA Instruments) by subjecting the resin adhesive to a hot-cold-heat cycle at 80 – 150 °C at a rate of 10 °C min<sup>-1</sup> in a nitrogen atmosphere. The samples were heated to 300 °C at a rate of 10 °C min<sup>-1</sup>.

Rheology. Place a quantified amount of adhesive into a beaker and their rheological behavior was followed using the HR 20 rheometer (TA Instruments Ltd). The storage modulus ( $G'$ ) and loss modulus ( $G''$ ) of the adhesives were measured at an angular frequency ( $\omega$ ) of 10 rad s<sup>-1</sup> and a constant strain ( $\gamma$ ) of 12.5%.

Bonding Strength. The plywood test specimens were prepared by lapping two natural moso bamboo veneers, with a single veneer size of 9 cm (length)  $\times$  2 cm (width)  $\times$  0.25 cm (thickness), the final specimen overall size of 16 cm  $\times$  2 cm, and a lap joint area of 190 mm<sup>2</sup> – 200 mm<sup>2</sup>. As shown in Figure S, the plywood was then hot pressed (70 °C, 0.5 MPa, 10 min). The hot-pressing process adopted a constant pressure of 0.5 MPa throughout the whole process; after the hot-pressing time was reached, the pressure was released immediately, and the plywood samples were taken out and naturally cooled to room temperature under ambient conditions (25 °C, 60% relative humidity). Three-layer plywood specimens (20 mm  $\times$  20 mm) were made following GB/T 17657-2022, and bonding strength was determined following GB/T 9846-2015. Tensile testing was performed on a 5000 N loadcell Instron 5965 machine at 24 mm initial gauge and 20 mm min<sup>-1</sup> crosshead speed. For each result a minimum of five rectangular adhesives samples were tested to obtain the average bonding strength.

Scanning electron microscope (SEM). A scanning electron microscope (SEM, JEOL JSM-7800F) was used to analyze the surface and cross-sectional characteristics of

adhesive samples. Before the SEM observation, the samples were sputtered with a thin layer of gold coating.

**Volatile Organic Compound (VOCs) Content Test.** In accordance with GB33372-2020 Limits of VOCs in adhesives for wood-based panels and furniture, the VOCs content of the adhesive was tested using the gravimetric method. A certain mass of adhesive sample (accurate to 0.001 g) was weighed and placed in a clean aluminum alloy container, which was then placed in a constant temperature oven set at  $(105 \pm 2)$  °C for 3 hours of heat treatment. After cooling to room temperature in a desiccator, the residual mass of the sample was weighed. The VOCs content was calculated by the mass loss before and after heating, excluding the moisture content (tested separately by Karl Fischer method). The test was conducted with 3 parallel samples, and the average value was taken as the final VOCs content. The result was compared with the limit value specified in GB33372-2020 to evaluate the environmental friendliness of the adhesive.

**Free Formaldehyde Emission Test.** The free formaldehyde emission of the adhesive and bonded plywood was tested using the desiccator method specified in GB18583-2008 Limits of harmful substances in adhesives for interior decoration and finishing materials.

**Solvent Resistance Test.** An equal amount of solvent (e.g., methanol, ethyl acetate solution) was added to a beaker. Plywood samples were placed into the beaker, sealed with plastic wrap, and soaked for the same duration (5 parallel samples per group). After soaking, the samples were taken out and dried in a well-ventilated area, and their performance changes were tested by tensile test.

**UV Aging Resistance Test.** For plywood samples prepared with different depolymerization temperature gradients, long-term weathering tests were conducted in an ultraviolet accelerated weathering test chamber, respectively. A four-stage cyclic program was adopted, and the samples were subjected to 20 repeated cycles from Stage 1 to Stage 3. In Stage 1 (UV irradiation), the samples were exposed to UV radiation for 7.00 h at an irradiance of  $0.76 \text{ W} \cdot \text{m}^{-2}$  with a black panel temperature of 55 °C, both

front and rear UV lamps of the chamber being turned on. In Stage 2 (condensation), the samples were placed under a condensation environment at 50 °C for 4.00 h. In Stage 3 (water spray), the samples were sprayed with water for 1.00 h. In Stage 4 (holding), the chamber system was stabilized for 0.10 h before the next cycle.

Plywood Grade Test. Referring to the national standard GB/T 17657-2022 Test methods of evaluating the properties of wood-based panels and surface decorated wood-based panels, the plywood bonded with the prepared adhesive was subjected to comprehensive performance testing to determine its product grade. The standard categorizes plywood into three classes based on water resistance, with specific immersion-drying cycle protocols as follows: Class I (weather-resistant, for outdoor use): Specimens were initially immersed in boiling water for 4 h, followed by drying at  $(63 \pm 3)$  °C for 20 h; subsequent re-immersion in boiling water for 4 h was conducted, and the cycle was completed by final drying at  $(63 \pm 3)$  °C for 3 h; Class II (water-resistant, for humid indoor use): Specimens were immersed in  $(63 \pm 3)$  °C hot water for 3 h, and subsequently dried at  $(63 \pm 3)$  °C for 3 h to complete the test cycle; Class III (ordinary, for dry indoor use): Specimens were immersed in  $(35 \pm 3)$  °C warm water for 2 h, followed by drying at  $(63 \pm 3)$  °C for 3 h to finish the evaluation.

Solid Content Test. The solid content of the adhesive was determined in accordance with GB/T 2793-1995 Determination of non-volatile matter content of adhesives.

#### 4. Oxidation mechanism of polyvinyl alcohol

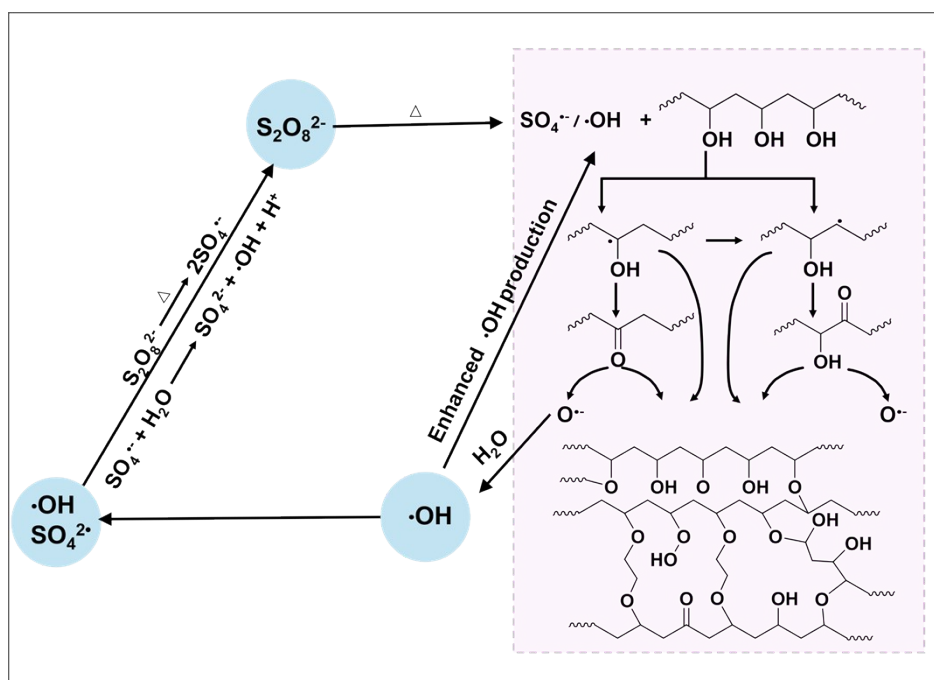

**Figure S1.** Oxidation mechanism of polyvinyl alcohol.<sup>2</sup>

## 5. GC-MS details of lignin oil

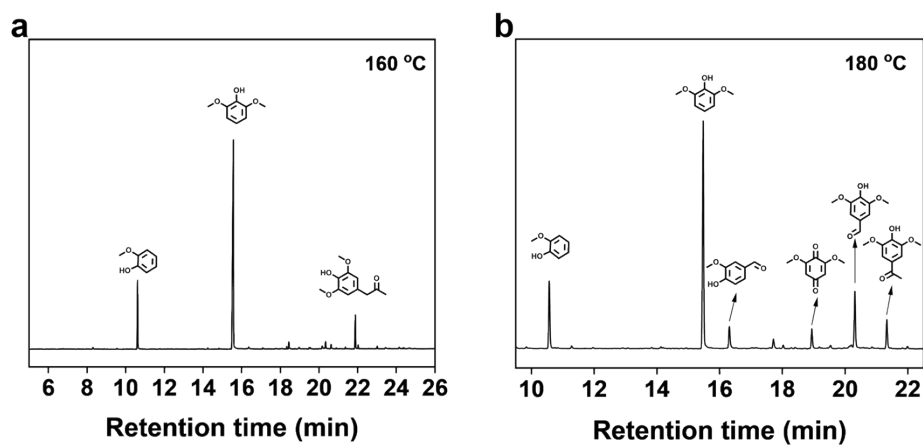

**Figure S2.** GC-MS spectra of lignin oil obtained at depolymerized temperatures of 160 °C (a) and 180 °C (b).

## 6. 2D-HSQC NMR details of lignin and lignin oil

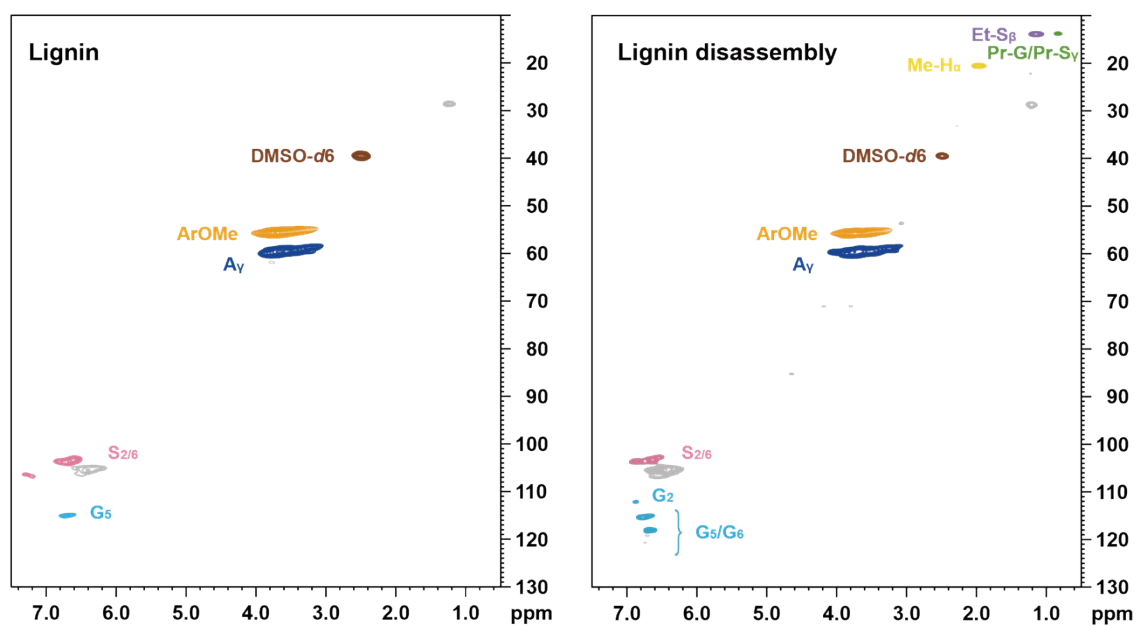

**Figure S3.** 2D HSQC NMR spectra of native lignin and lignin oil.

## 7. TG and DTG details of adhesive samples and lignin

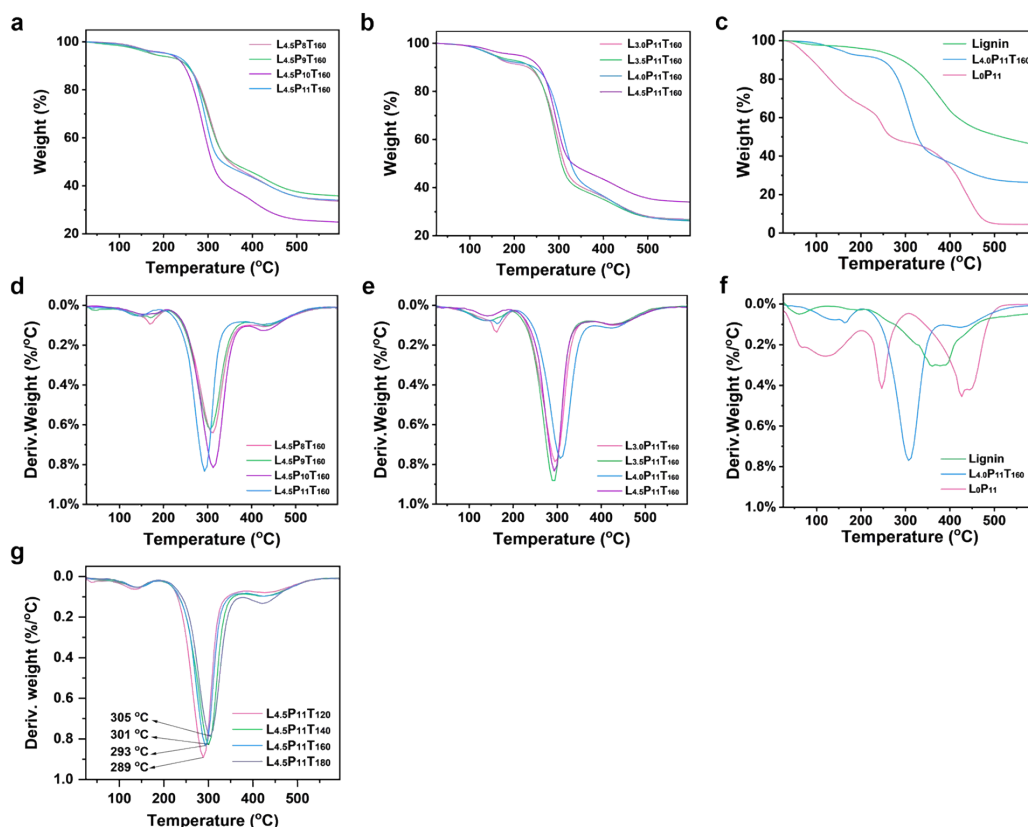

**Figure S4.** (a) Thermogravimetric curves of adhesives prepared with different PVA contents. (b) Thermogravimetric curves of adhesives prepared with different lignin contents. (c) Thermogravimetric curves of the lignin-containing raw material, the optimal-performance adhesive, and the blank adhesive (without lignin). (d) Differential thermogravimetric curves of adhesives prepared with different PVA contents. (e) Differential thermogravimetric curves of adhesives prepared with different lignin contents. (f) Differential thermogravimetric curves of the lignin-containing raw material, the optimal-performance adhesive, and the blank adhesive (without lignin). (g) Differential thermogravimetric curves of adhesives prepared at different temperatures.

## 8. DSC details of adhesive samples and lignin

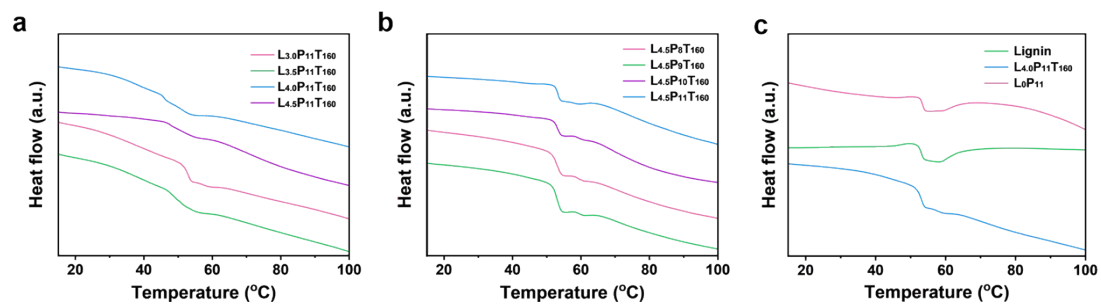

**Figure S5.** (a) DSC curves of adhesives prepared with different lignin contents. (b) DSC curves of adhesives prepared with different PVA contents. (c) DSC curves of the lignin-containing raw material, the optimal-performance adhesive, and the blank adhesive (without lignin).

## 9. FTIR details of adhesive samples and lignin

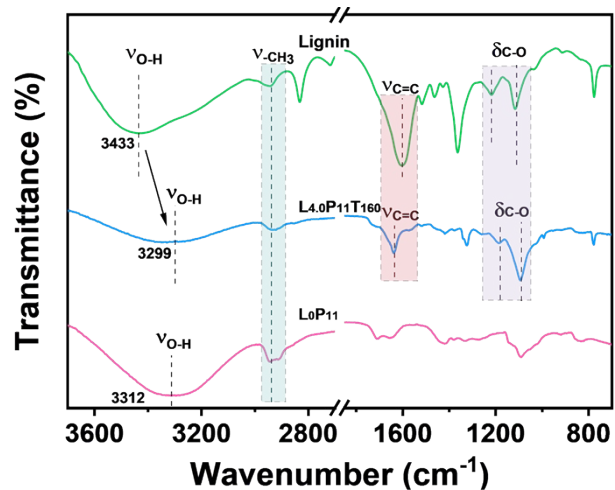

**Figure S6.** FT-IR curves of the lignin-containing raw material, the optimal-performance adhesive, and the blank adhesive (without lignin).

## 10. Rheological characterization of adhesive samples

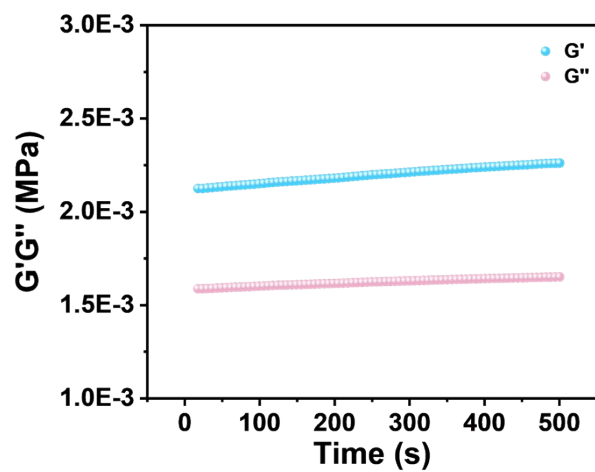

**Figure S7.** Time-dependent rheological characterization of adhesives.

## 11. Bonding properties of adhesives

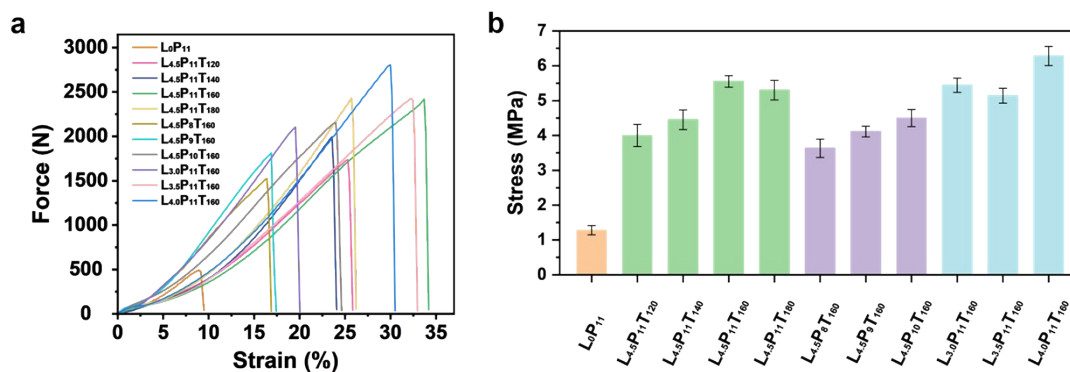

**Figure S8.** (a) Force-Strain curves of all plywood samples prepared with different adhesives. (b) Dry shear strength of all plywood samples prepared with different adhesives.

## 12. Direct preparation of adhesives from lignin

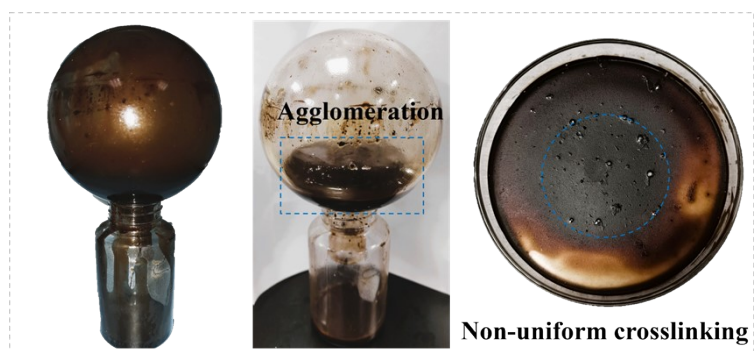

**Figure S9.** Images of adhesive prepared by incorporating undecomposed lignin into the system.

### 13. Curing conditions of plywood samples

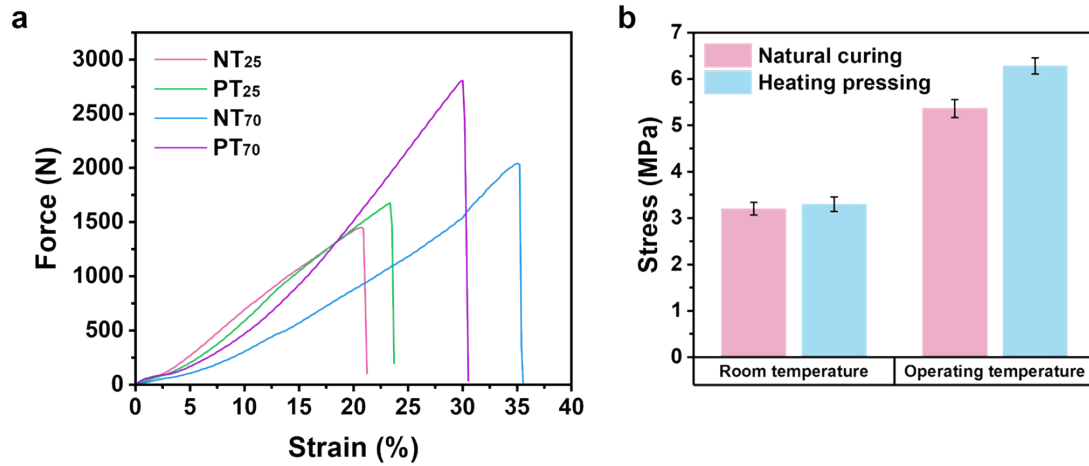

**Figure S10.** (a) Stress-strain curves of plywood prepared at room temperature without pressure, room temperature with pressure, working temperature (70 °C) without pressure, and working temperature (70 °C) with pressure. (b) Tensile shear strength curves of plywood prepared at room temperature without pressure, room temperature with pressure, working temperature (70 °C) without pressure, and working temperature (70 °C) with pressure.

#### 14. Practical application scenarios for adhesives

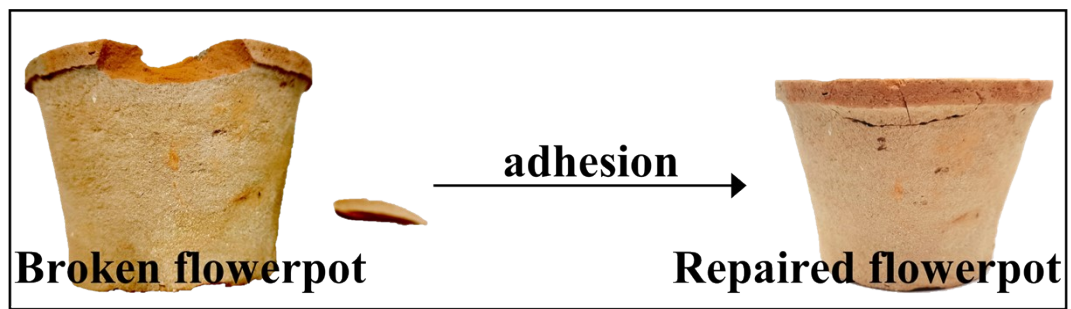

**Figure S11.** Schematic diagram of repairing flowerpot with adhesive under normal temperature and non-pressure condition.

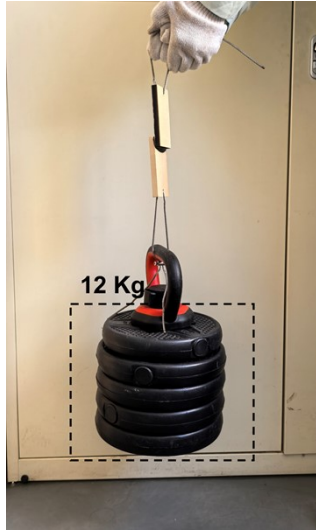

**Figure S12.** Image of LPT adhesives-bonded wood sheets to support a dumbbell weighing 12 kg (185 cm of height) with a bonding area of 18.5 x 48.5 mm<sup>2</sup>.

## 15. VOCs details of adhesives

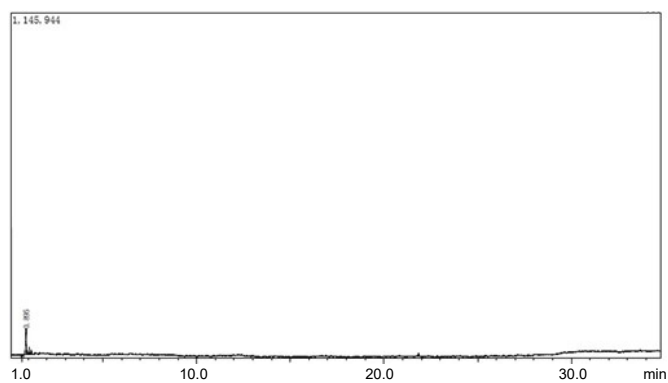

**Figure S13.** GC-MS total ion chromatogram (TIC) of VOCs emitted from LPT adhesives.

## 16. Screening of hot-pressing conditions for plywood

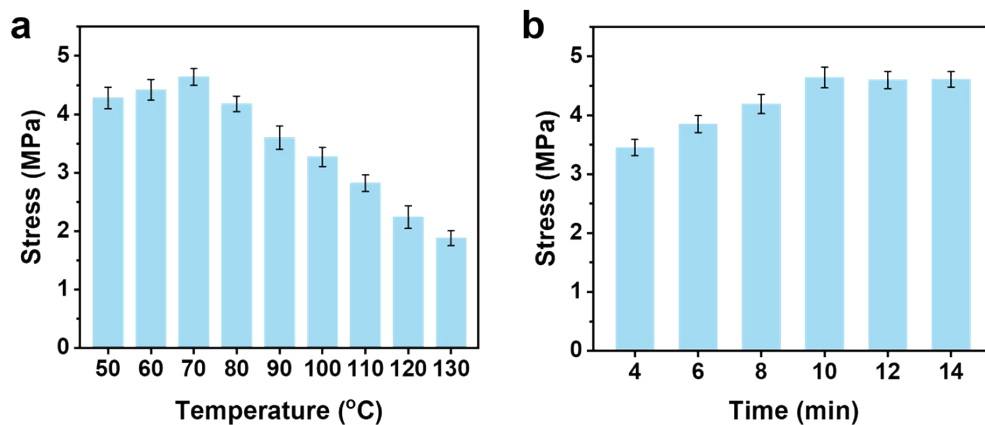

**Figure S14.** (a) Tensile shear strength of L<sub>4.0</sub>P<sub>11</sub>T<sub>140</sub>-bonded plywood at different hot-pressing temperatures (0.5 MPa, 10 min). (b) Tensile shear strength of L<sub>4.0</sub>P<sub>11</sub>T<sub>140</sub>-bonded plywood at different hot-pressing times (70 °C, 0.5 MPa).

## 17. <sup>31</sup>P NMR details of adhesive samples and lignin

**Table S1.** Hydroxyl group content and its distribution in lignin at different depolymerization temperatures

|                  | Aliphatic hydroxyl<br>(mmol g <sup>-1</sup> ) | S<br>(mmol g <sup>-1</sup> ) | G<br>(mmol g <sup>-1</sup> ) | H<br>(mmol g <sup>-1</sup> ) | Carboxyl<br>(mmol g <sup>-1</sup> ) | Phenolic hydroxyl<br>(mmol g <sup>-1</sup> ) | Total hydroxyl<br>content<br>(mmol g <sup>-1</sup> ) |
|------------------|-----------------------------------------------|------------------------------|------------------------------|------------------------------|-------------------------------------|----------------------------------------------|------------------------------------------------------|
| Lignin           | 0.35                                          | 1.93                         | 0.26                         | 0                            | 0                                   | 2.19                                         | 2.54                                                 |
| T <sub>120</sub> | 0.22                                          | 2.46                         | 0.44                         | 0                            | 0.02                                | 2.92                                         | 3.14                                                 |
| T <sub>140</sub> | 0.19                                          | 2.47                         | 0.71                         | 0                            | 0.01                                | 3.19                                         | 3.38                                                 |
| T <sub>160</sub> | 0.38                                          | 3.28                         | 0.77                         | 0.03                         | 0.01                                | 4.09                                         | 4.47                                                 |
| T <sub>180</sub> | 0.58                                          | 2.74                         | 0.61                         | 0.02                         | 0.01                                | 3.38                                         | 3.96                                                 |

## 18. Properties comparison

**Table S2.** Comparison of mechanical properties and water resistance of LPT with other biomass-based adhesives.

| Adhesive sample | Categories | Dry stress (MPa) | Wet stress (MPa) | Reference |
|-----------------|------------|------------------|------------------|-----------|
| T <sub>1</sub>  | TA         | 1.82             | 0.98             | 3         |
| T <sub>2</sub>  | TA         | 1.67             | 0.73             | 4         |
| T <sub>3</sub>  | TA         | 1.07             | 0.95             | 5         |
| S <sub>1</sub>  | SM         | 2.24             | 1.37             | 6         |
| S <sub>2</sub>  | SM         | 2.00             | 0.94             | 7         |
| S <sub>3</sub>  | SM         | 2.44             | 1.35             | 8         |
| CS <sub>1</sub> | CS         | 2.71             | 1.92             | 9         |
| CS <sub>2</sub> | CS         | 3.09             | 1.54             | 10        |
| CS <sub>3</sub> | CS         | 2.10             | 1.10             | 11        |
| C <sub>1</sub>  | Cellulose  | 3.09             | 1.20             | 12        |
| C <sub>2</sub>  | Cellulose  | 4.04             | 2.42             | 13        |
| C <sub>3</sub>  | Cellulose  | 4.90             | 1.70             | 14        |
| L <sub>1</sub>  | Lignin     | 5.40             | 3.50             | 15        |
| L <sub>2</sub>  | Lignin     | 3.50             | 1.50             | 16        |
| This work       | Lignin     | 6.28             | 3.26             | -----     |

**Table S3.** Comparison of cost estimation (all raw materials), temperature tolerance range, types of solvent resistance, water resistance and material sustainability of LPT with other biomass-based adhesives.

|                                                   | ETGSO     | SMAP      | SSFP      | SP/LPU   | BD/P-NSD | This work  |
|---------------------------------------------------|-----------|-----------|-----------|----------|----------|------------|
| 1 costs <sup>-1</sup><br>(RMB ton <sup>-1</sup> ) | 16843     | 2704      | 14286     | 2420     | 1994     | 2628.6     |
| Low temperature<br>tolerance                      | -200      | -40       | -196      | -40      | 30       | -196       |
| Temperature<br>tolerance range                    | -200 – 85 | -40 – 120 | -196 – 55 | -40 – 63 | 30 – 150 | -196 – 100 |
| Types of solvent<br>resistance                    | 9         | 4         | 6         | 4        | 1        | 4          |
| Water resistance                                  | Yes       | Yes       | Yes       | Yes      | NO       | Yes        |
| Sustainability                                    | NO        | Yes       | Yes       | Yes      | Yes      | Yes        |
| Reference                                         | 17        | 18        | 19        | 20       | 21       | -----      |

## 19. Cost accounting for adhesives

**Table S4.** The unit price of L<sub>4.0</sub>P<sub>11</sub>T<sub>160</sub> adhesive in tons.

| Materials                                    | Price (RMB<br>ton <sup>-1</sup> ) | Sources               | Consumption (kg) | Cost (RMB<br>ton <sup>-1</sup> ) |
|----------------------------------------------|-----------------------------------|-----------------------|------------------|----------------------------------|
| Lignin                                       | 2000                              | Alibaba 1688          | 27500            | 55                               |
| PVA                                          | 10800                             | Alibaba 1688          | 75000            | 810                              |
| GA                                           | 152000                            | Alibaba 1688          | 3370             | 512                              |
| K <sub>2</sub> S <sub>2</sub> O <sub>8</sub> | 250000                            | Alibaba 1688          | 3125             | 781                              |
| CH <sub>3</sub> OH                           | 13600                             | Alibaba 1688          | 15840            | 252                              |
| NaOH                                         | 56000                             | Alibaba 1688          | 4500             | 215                              |
| Water                                        | 4.16                              | Government<br>pricing | 866500           | 3.6                              |
| Total cost                                   |                                   |                       |                  | 2628.6                           |

## 20. Formaldehyde emission

**Table S5.** Formaldehyde emission released from LPT adhesives

| Adhesive sample | $(\rho_t - \rho_b)$<br>( $\mu\text{g mL}^{-1}$ ) | V<br>(mL) | f | M (g)  | Content<br>( $\text{g Kg}^{-1}$ ) | Average content<br>( $\text{g Kg}^{-1}$ ) |
|-----------------|--------------------------------------------------|-----------|---|--------|-----------------------------------|-------------------------------------------|
| 1-1             | 0.4523                                           | 50        | 5 | 1.1292 | 0.100                             | 0.100                                     |
| 1-2             | 0.4514                                           | 50        | 5 | 1.1292 | 0.100                             |                                           |
| 1-3             | 0.4800                                           | 50        | 5 | 1.2201 | 0.098                             |                                           |
| 1-4             | 0.4786                                           | 50        | 5 | 1.2201 | 0.098                             |                                           |

$\rho_t$ : Mass concentration of formaldehyde in the sample solution read from the standard curve.

$\rho_b$ : Mass concentration of formaldehyde in the blank solution read from the standard curve.

V: Volume of the distillate after dilution to a fixed volume.

M: Mass of the sample.

f: Dilution factor of the sample solution.

## 21. Solid content

**Table S6.** Solid content of the LPT adhesives

| Adhesive sample | $(m_1 - m_0)$<br>(g) | $m_s$<br>(g) | S      | $\bar{S}$ |
|-----------------|----------------------|--------------|--------|-----------|
| 1-1             | 0.2391               | 1.4490       | 16.50% |           |
| 1-2             | 0.4251               | 2.6206       | 16.22% | 16.04%    |
| 1-3             | 0.3265               | 2.1211       | 15.39% |           |

## 22. Limits of harmful substances in adhesives

**Table S7.** Limits of hazardous substances in water-based adhesives

| Item                                                      | Urea-formaldehyde resin<br>adhesives | Polyvinyl acetate<br>emulsion adhesives | Phenolic resin<br>adhesives | Polyurethane<br>adhesives | Other<br>adhesives |
|-----------------------------------------------------------|--------------------------------------|-----------------------------------------|-----------------------------|---------------------------|--------------------|
| Free formaldehyde (g kg <sup>-1</sup> )                   | ≤1.0                                 | ≤1.0                                    | ≤1.0                        | —                         | ≤1.0               |
| Benzene (g kg <sup>-1</sup> )                             | —                                    | ≤0.2                                    | —                           | —                         | —                  |
| Toluene + Xylene (g kg <sup>-1</sup> )                    | —                                    | ≤10.0                                   | —                           | —                         | —                  |
| Total volatile organic<br>compounds (g kg <sup>-1</sup> ) | ≤350.0                               | ≤110.0                                  | ≤250.0                      | ≤100.0                    | ≤350.0             |

Notes:

1. The symbol “—” indicates that no limit is specified for the corresponding item in the applicable standard.
2. The limits for free formaldehyde, benzene, toluene + xylene, and total volatile organic compounds are in accordance with the national standard for water-based wood adhesives (GB 18583-2008).
3. All values are expressed on a mass or volume basis as specified and were determined using standard test methods for adhesive hazardous substance analysis.

### 23. Key operating parameters of the UV aging chamber

**Table S8.** Detailed operation parameters for the four-stage cyclic ultraviolet accelerated weathering test.

| Stage | Stage type       | Irradiation<br>time (h) | Condensation<br>time (h) | Sprinkling<br>time (h) | Holding<br>time (h) | Black panel<br>temperature<br>(°C) | Irradiance (W<br>m <sup>-2</sup> ) | Front<br>lamp | Rear<br>lamp |
|-------|------------------|-------------------------|--------------------------|------------------------|---------------------|------------------------------------|------------------------------------|---------------|--------------|
| 1     | Irradiation      | 7.00                    | —                        | —                      | —                   | 55.0                               | 0.76                               | On            | On           |
| 2     | Condensation     | —                       | 4.00                     | —                      | —                   | —                                  | —                                  | Off           | Off          |
| 3     | Water sprinkling | —                       | —                        | 1.00                   | —                   | —                                  | —                                  | Off           | ON           |
| 4     | Holding          | —                       | —                        | —                      | 0.10                | —                                  | —                                  | Off           | Off          |

On/Off: Lamp status.

—: Not applicable in this stage.

## 24. References

- [1] E. C. Gaugler, W. Radke, A. P. Vogt and D. A. Smith, *J. Anal. Sci. Technol.*, 2021, **12**, 30.
- [2] F. Li, H. Ma, C. Shen, Y. Pan, Y. Zhang, Y. Liu, C. Xu and D. Wu, *Appl. Catal. B Environ.*, 2021, **285**, 119763.
- [3] Z. Liu, Z. Fan, B. Song, G. Yang and H. Guo, *Int. J. Biol. Macromol.*, 2025, **329**, 147695.
- [4] Y. Chen, Y. Lyu, X. Yuan, X. Ji, F. Zhang, X. Li, J. Li, X. Zhan and J. Li, *Int. J. Biol. Macromol.*, 2022, **219**, 611-625.
- [5] C. Liu, Y. Zhang, X. Li, J. Luo, Q. Gao and J. Li, *Ind. Crop. Prod.*, 2017, **108**, 363-370.
- [6] X. Liu, J. Li, S. Liu, Z. Zhang, Y. Qing, X. Li, M. Liu and Y. Wu, *Int. J. Biol. Macromol.*, 2025, **320**, 145875.
- [7] H. Chen, Q. Wu, X. Ren, X. Zhu and D. Fan, *Chem. Eng. J.*, 2024, **494**, 153198.
- [8] Z. Lei, J. Shao, C. Li, S. Jiang, M. Yao and J. Li, *Adv. Funct. Mater.*, 2025, **35**, 2501624.
- [9] Q. Huang, Z. Li, Z. Bao, X. Xu, H. Liu, M. Zhang, Y. Qing, X. Li and Y. Wu, *Green Chem.*, 2025, **27**, 12319-12332.
- [10] Z. Kan, Y. Huang, F. Wang, L. Liu, D. Wei, H. Guo, Y. Chen, L. Xie, L. Zhang and G. Du, *Int. J. Biol. Macromol.*, 2025, **329**, 147835.
- [11] L. Cai, Y. Chen, Z. Lu, M. Wei, X. Zhao, Y. Xie, J. Li and S. Xiao, *Carbohydr. Polym.*, 2024, **329**, 121765.
- [12] S. Liu, G. Du, H. Yang, H. Su, X. Ran, J. Li, L. Zhang, W. Gao and L. Yang, *ACS Sustainable Chem. Eng.*, 2021, **9**, 16849-16861.
- [13] G. Yang, Z. Gong, B. Zhou, X. Luo, J. Liu, G. Du, C. Zhao and L. Shuai, *Green Chem.*, 2024, **26**, 753-759.
- [14] S. Zhang, S. Koskela, H. Meinhard, P. Penttilä, M. Awais, M. B. Linder, S. Wang and L. Rautkari, *Nat. Commun.*, 2025, **16**, 7902.
- [15] T. Zou, M. H. Sipponen, A. Henn and M. Österberg, *ACS Nano*, 2021, **15**, 4811-

4823.

- [16] W. Li, H. Sun, G. Wang, W. Sui, L. Dai and C. Si, *Green Chem.*, 2023, **25**, 2241-2261.
- [17] W. Gao, Z. Fu, W. Pan, C. Qin, C. Ning, M. Liu, Z. Qin, Z. Li and S. Zhao, *Adv. Funct. Mater.*, 2025, **35**, e11884.
- [18] S. Chen, Q. Wang, J. Shao, X. Li, Y. Bian, S. Jiang, Z. Cao and J. Li, *ACS Nano*, 2025, **19**, 15876-15885.
- [19] X. Xie, Y. Jiang, X. Yao, J. Zhang, Z. Zhang, T. Huang, R. Li, Y. Chen, S.-L. Li and Y.-Q. Lan, *Nat. Commun.*, 2024, **15**, 5017.
- [20] Y. Zhou, J. Luo, Q. Jing, S. Ge, S. Chen, Z. Guo, J. Li, Z. Liu, P. He, X. He and B. B. Xu, *Adv. Funct. Mater.*, 2024, **34**, 2406557.
- [21] J. Shao, X. Zhang, Z. Lei, S. Jiang, M. Yao, Y. Wei and J. Li, *Adv. Funct. Mater.*, 2026, e20999. <https://doi.org/10.1002/adfm.202520999>.
